# Supplementary material
Source: Springer Nature journal article supplement (https://www.springermedizin.de/resource/supplementary/13012_2013_644_MOESM1_ESM.pdf/9630438)

Clusters

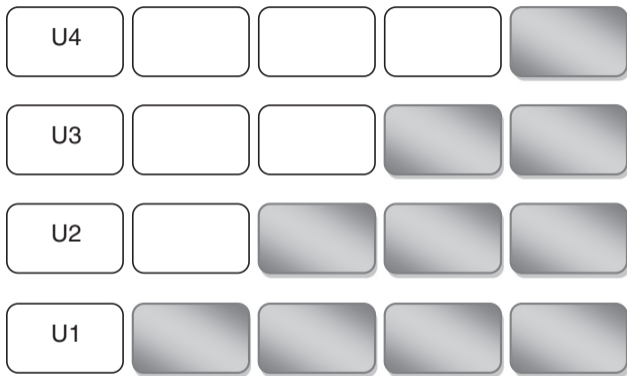

P1

P2

P3

P4

P5

Periods

Supplement: MOESM1 [file 9630438]
